# Supplementary material
Source: Springer Nature journal article supplement (https://www.springermedizin.de/resource/supplementary/12968_2011_2569_MOESM4_ESM.pdf/9582254)

## RF-induced heating at the catheter tip

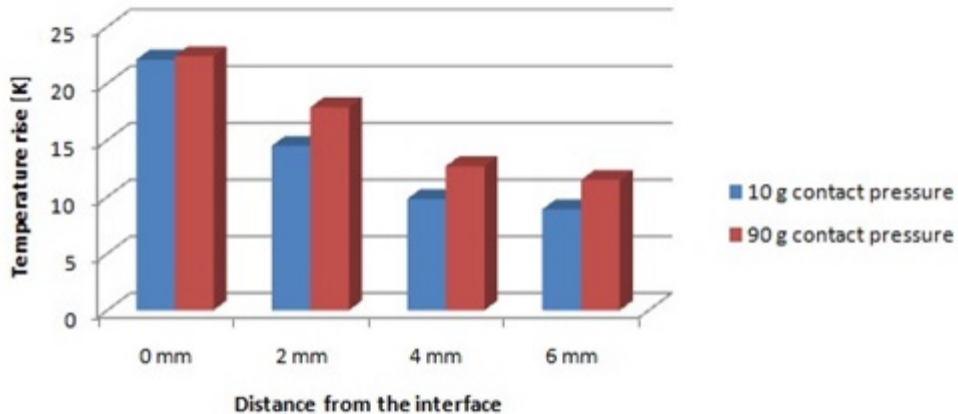

Supplement: MOESM4 [file 9582254]
